# Supplementary material for: Fluoride-free synthesis of high-silica CHA-type aluminosilicates by seed-assisted aging treatment for starting gel
Source: Royal Society of Chemistry journal article supplement (doi:10.1039/d2cc04032h), 2022-01-01
Supplement: d2cc04032h1.pdf [file d2cc04032h1.pdf]

## *Electronic Supplementary Information*

### **Fluoride-free synthesis of high-silica CHA-type aluminosilicates by seed-assisted aging treatment for starting gel**

Ryota Osuga,<sup>a,\*</sup> Mizuho Yabushita,<sup>b</sup> Takeshi Matsumoto,<sup>c</sup> Masato Sawada,<sup>c</sup> Toshiyuki Yokoi,<sup>c</sup>  
Kiyoshi Kanie,<sup>a,d</sup> and Atsushi Muramatsu <sup>a,d\*</sup>

*a Institute of Multidisciplinary Research for Advanced Materials, Tohoku University, Sendai, Miyagi 980-8577, Japan*

*b Department of Applied Chemistry, School of Engineering, Tohoku University, 6-6-07 Aoba, Aramaki, Aoba-ku, Sendai, Miyagi 980-8579, Japan*

*c Institute for Innovative Research, Tokyo Institute of Technology, 4259 Nagatsuta, Midori-ku, Yokohama 226-8503, Japan*

*d International Center for Synchrotron Radiation Innovation Smart, Tohoku University, 2-1-1 Katahira, Aoba-ku, Sendai, Miyagi 980-8577, Japan*

#### **Author information**

#### **Corresponding Authors**

\*E-mail; ryota.osuga.d4@tohoku.ac.jp (R. O.)

\*E-mail; mura@tohoku.ac.jp (A. M.)

## Table of Contents

|                                                                                                                                                                                             |     |
|---------------------------------------------------------------------------------------------------------------------------------------------------------------------------------------------|-----|
| 1. <b>Experimental</b> .....                                                                                                                                                                | S3  |
| 2. <b>Calculation methods</b> .....                                                                                                                                                         | S5  |
| 3. <b>Table S1</b> Comparison of Si/Al ratios and synthetic conditions of this work and those of previous studies involving synthesis of high-silica <b>CHA</b> -type aluminosilicates..... | S6  |
| 4. <b>Figure S1</b> Building units for <b>CHA</b> -type frameworks. ....                                                                                                                    | S7  |
| 5. <b>Figure S2</b> ESI-MS spectra of liquid phase of starting gels. ....                                                                                                                   | S8  |
| 6. <b>Table S2</b> Comparison for intensity of ESI-MS spectra. ....                                                                                                                         | S9  |
| 7. <b>Figure S3</b> XRD patterns for <b>CHA</b> -type aluminosilicates with different aging times. ....                                                                                     | S10 |
| 8. <b>Figure S4</b> N <sub>2</sub> adsorption–desorption isotherms for synthesized samples. ....                                                                                            | S11 |
| 9. <b>Figure S5</b> <sup>27</sup> Al MAS NMR spectra and NH <sub>3</sub> -TPD profiles for each sample.....                                                                                 | S12 |
| 10. <b>Figure S6</b> FT-IR spectra of SSZ-13(10) and <b>CHA</b> (200). ....                                                                                                                 | S13 |
| 11. <b>Figure S7</b> <sup>29</sup> Si MAS NMR spectra for each sample. ....                                                                                                                 | S14 |
| 12. <b>Table S3</b> Quantitative analysis for <sup>29</sup> Si MAS NMR measurements. ....                                                                                                   | S15 |
| 13. <b>Table S4</b> Catalytic performance of <b>CHA</b> -type aluminosilicates in MTO reaction at initial stage. ....                                                                       | S16 |
| 14. <b>Supplementary references</b> .....                                                                                                                                                   | S17 |

## Experimental

### 1. Synthesis of SSZ-13.

SSZ-13(10) (**CHA**, Si/Al = 10) was synthesized via hydrothermal synthesis using a previously reported method.<sup>S1</sup> NaOH (FUJIFILM Wako Pure Chemical) and Al(OH)<sub>3</sub> (Sigma-Aldrich) were dissolved in a 20 wt% *N,N,N*-trimethyladamantanammonium hydroxide (TMAdaOH, Sachem) aqueous solution. Amorphous silica (Cabosil-M5) was then added to the solution such that the gel composition was 1.0SiO<sub>2</sub> : 0.1Al(OH)<sub>3</sub> : 0.2TMAdaOH : 0.2NaOH : 30H<sub>2</sub>O. The prepared gel was hydrothermally treated at 170 °C for 5 days by tumbling at 40 rpm. The as-prepared sample was calcined at 600 °C for 6 h. The sample was then ion-exchanged using a 2.5 M NH<sub>4</sub>NO<sub>3</sub> aqueous solution at 80 °C for 3 h twice to obtain the NH<sub>4</sub><sup>+</sup>-form sample, which was further converted to the H<sup>+</sup>-form of SSZ-13 by calcination at 600 °C for 3 h.

### 2. Synthesis of high-silica **CHA**-type aluminosilicates.

Starting gels for high-silica **CHA**-type aluminosilicates were prepared via the same procedure as SSZ-13(10) using TMAdaOH as an OSDA. The Si/Al molar ratio of the gels was varied in the range from 50 to 500. Before the hydrothermal treatment, SSZ-13(10) (2 wt% to SiO<sub>2</sub>) was added to the starting gel; the gel was then stirred at room temperature for 24 h. The starting gels were hydrothermally treated at 170 °C for 2 days by tumbling at 40 rpm. Afterwards, the ion-exchange procedures were performed in the same manner as SSZ-13(10). The obtained samples were designated as CHA(*X*), where *X* is the Si/Al molar ratio in the starting gel.

### 3. Characterization.

The synthesized zeolites were characterized using various techniques. The crystal structure was investigated by powder X-ray diffraction (XRD; Ultima IV, Rigaku, Cu K $\alpha$  radiation (40 kV, 40 mA)) analysis. The Si/Al ratio was determined by inductively coupled plasma atomic emission spectroscopy (ICP-AES; SPECTRO ARCOS, AMETEK) measurements. The number of organic-structure-directing agents was determined by a thermogravimetry-differential thermal analysis (TG-DTA) measurement (RigakuThurmo plus EVO II, Rigaku). The specific surface area and micropore volume were elucidated using N<sub>2</sub> adsorption–desorption measurements (BELSORP-mini, MicrotracBEL) after pretreatment (BELPREP-vac III, MicrotracBEL) of the samples at 400 °C for 1 h under reduced pressure. The Brunauer–Emmett–Teller (BET) specific surface area was calculated from the adsorption data in the relative pressure ( $p/p_0$ ) range from 0.01 to 0.1. The micropore volume was estimated by the *t*-plot method. Morphological observations were conducted by field-emission scanning electron microscopy (FE-SEM; S-5200, Hitachi). Electrospray ionization mass (ESI-MS) spectroscopy was performed in negative-ion

mode using a TripleTOF 5600 System (AB SCIEX). ESI-MS spectra were acquired using an ion-spray voltage of  $-4.5$  kV, curtain gas pressure of 10 psi, nebulizer gas pressure of 15 psi, interface heater temperature of  $200$  °C, and flow rate of  $10$   $\mu\text{L min}^{-1}$ . High-resolution  $^{27}\text{Al}$  and  $^{29}\text{Si}$  MAS NMR spectra were recorded on a JEOL ECA-600 spectrometer (14.1 T) equipped with an additional 1 kW power amplifier. The chemical shifts of  $^{27}\text{Al}$  and  $^{29}\text{Si}$  were referenced to  $\text{AlNH}_4(\text{SO}_4)_2 \cdot 12\text{H}_2\text{O}$  at  $-0.54$  ppm and dimethylpolysiloxane at  $-34.12$  ppm, respectively. The samples were spun at 15 kHz using a 4 mm  $\text{ZrO}_2$  rotor. The number and strength of Brønsted acid sites were estimated using  $\text{NH}_3$  temperature-programmed desorption ( $\text{NH}_3$ -TPD) measurements, which were performed using a BELCAT (MicrotracBEL) equipped with a quadrupole mass spectrometer (Q-MS; BELMass, MicrotracBEL). Before the measurements, each sample was pretreated at  $500$  °C for 30 min under He flow at  $30$   $\text{mL min}^{-1}$ . The temperature range, ramp rate, and He flow rate for the TPD program were  $100$ – $700$  °C,  $10$  °C  $\text{min}^{-1}$ , and  $30$   $\text{mL min}^{-1}$ , respectively. The pretreated samples were exposed to 10.3 vol%  $\text{NH}_3/\text{He}$  gas at  $100$  °C for 30 min, and then physically adsorbed  $\text{NH}_3$  was removed under flowing He ( $30$   $\text{mL min}^{-1}$ ) at  $100$  °C for 30 min. Fourier transform infrared (FT-IR) spectra were obtained using a JASCO FT/IR-4600 spectrometer equipped with a mercury-cadmium-telluride detector. All spectra were collected as averages of 64 scans with a resolution of  $4$   $\text{cm}^{-1}$ . Self-supporting disks of each sample (20 mm diameter, 30 mg) were placed in a quartz cell connected to a conventional closed gas-circulation system. The samples were pretreated at  $450$  °C for 1 h under evacuation to remove the adsorbed species, and IR spectra were recorded at  $25$  °C.

#### 4. Methanol-to-olefins (MTO) reaction.

The MTO reaction was performed using a fixed-bed reactor connected to an online gas-chromatograph (GC-2014, Shimadzu) equipped with a HP-PLOT/Q capillary column and a flame ionization detector. The 50/80 mesh zeolite pellets without a binder were placed in a 6 mm quartz tubular flow reactor. The pretreatment was conducted at  $500$  °C for 30 min under flowing air ( $20$   $\text{mL min}^{-1}$ ). After the pretreatment, the reactor was cooled to  $350$  °C and the MTO reaction was started. The pressure of methanol was set at 5 kPa with Ar gas as the carrier; the weight-to-feed ratio ( $W/F$ ) for methanol was  $68$   $\text{g h mol}^{-1}$ . The product stream was analyzed using a system that automatically injected the product into a gas chromatograph connected directly to the outlet of the reactor via a heated transfer line.

## Calculation methods

### 1. Solid yield for synthesis.

The solid yield was calculated using:

$$\text{Solid yield [\%]} = \frac{\text{Weight of the calcined zeolite}}{\text{Weight of SiO}_2 \text{ and Al}_2\text{O}_3 \text{ in the starting gel}} \times 100$$

(Eq. S1)

### 2. Conversion and selectivity in MTO reaction.

The conversion and selectivity were calculated according to Eqs. S2 and S3:

$$\text{Conversion of methanol [\%]} = 1 - \frac{\text{Amount of methanol (in reacted gas)}}{\text{Amount of detected compounds (in reacted gas)}} \times 100$$

(Eq. S2)

$$\text{Product selectivity [\%]} = \frac{\text{Amount of the target product}}{\text{Amount of detected products (in reacted gas)}} \times 100$$

(Eq. S3)

**Table S1** Comparison of Si/Al ratios and synthetic conditions of this work and those of previous studies involving synthesis of high-silica **CHA**-type aluminosilicates.

| Authors                    | Si/Al molar ratio | Synthesis method               | Fluoride | Seed     | Publication year | Ref. |
|----------------------------|-------------------|--------------------------------|----------|----------|------------------|------|
| Zones <i>et al.</i>        | $\leq 14$         | Hydrothermal synthesis         | Not used | Not used | 1985             | [S2] |
| Díaz-Cabañas <i>et al.</i> | $\infty$          | Hydrothermal synthesis         | Used     | Not used | 1998             | [S3] |
| Zhu <i>et al.</i>          | $\leq 67$         | Hydrothermal synthesis         | Not used | Used     | 2008             | [S4] |
| Wu <i>et al.</i>           | $\leq 61$         | Hydrothermal synthesis         | Not used | Not used | 2014             | [S5] |
| Kubota <i>et al.</i>       | $\leq 146$        | Hydrothermal synthesis         | Not used | Used     | 2016             | [S6] |
| Zhu <i>et al.</i>          | $\leq 140$        | Acid post-treatment            | -        | -        | 2019             | [S7] |
| Li <i>et al.</i>           | $\leq 42$         | Steam-assisted crystallization | Not used | Not used | 2019             | [S8] |
| Al Jabri <i>et al.</i>     | $\leq 182$        | Dry gel conversion             | Used     | Used     | 2019             | [S9] |
| Osuga <i>et al.</i>        | $\leq 156$        | Hydrothermal synthesis         | Not used | Used     | This work        |      |

## Secondary Building Units

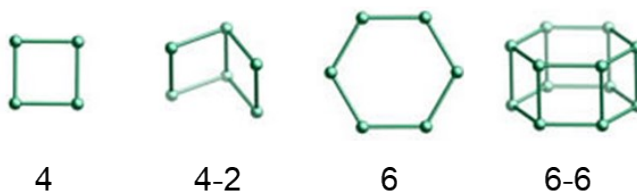

## Composite Building Units

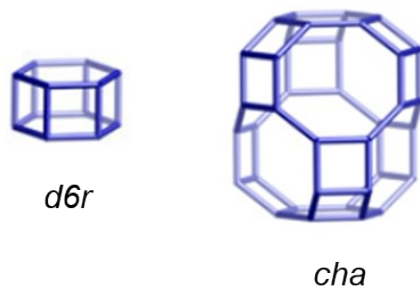

**Fig. S1** Building units for CHA-type frameworks.<sup>S10</sup>

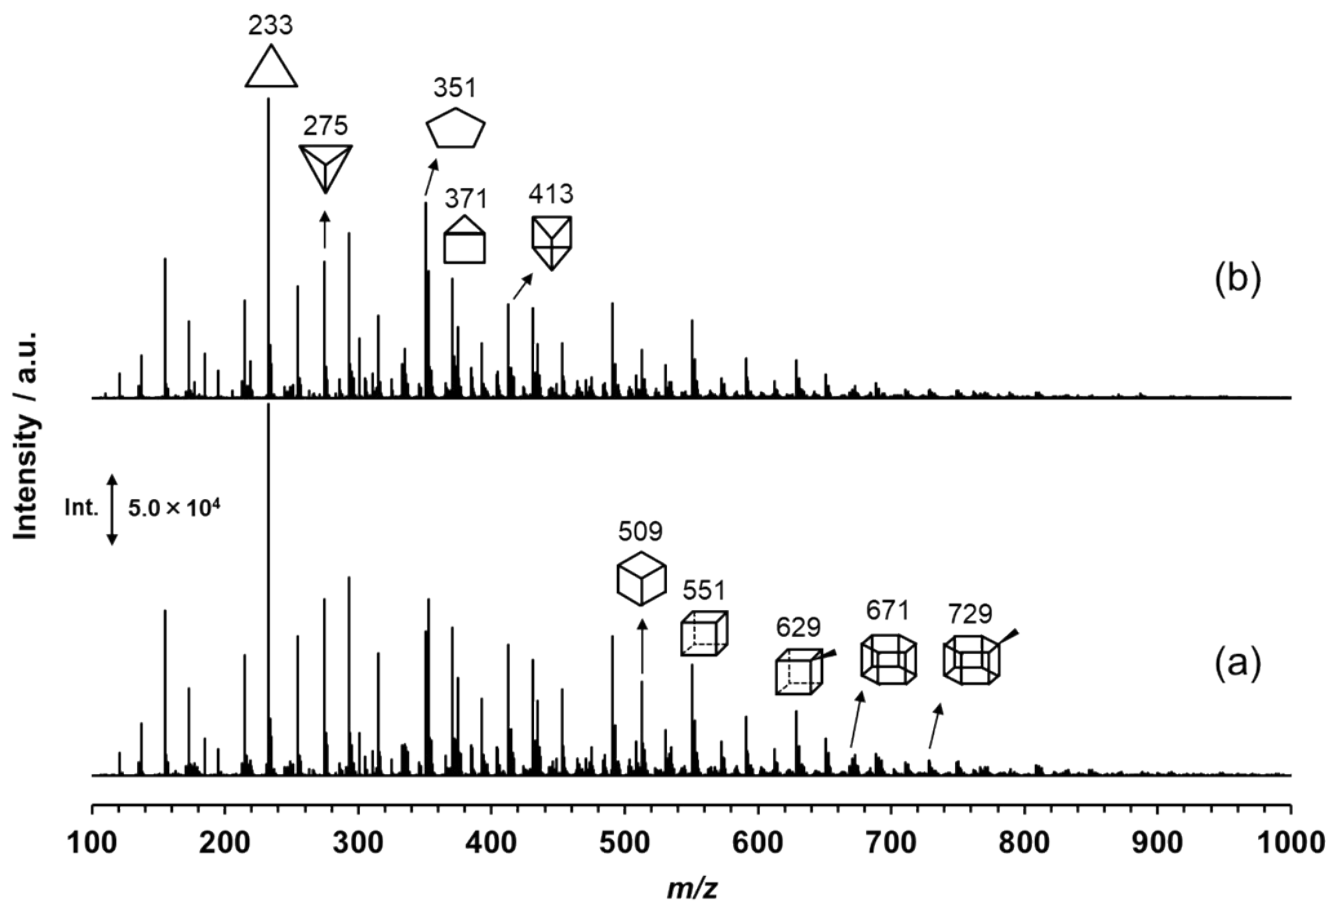

**Fig. S2** ESI-MS spectra of liquid phase of starting gels prepared using gel with same composition as that used to prepare CHA(200): (a) with seed crystal and (b) without seed crystal. The spectra were normalized on the basis of the peak of  $\text{TMAda}^+$  ( $m/z = 194$ ). Numbers at the chemical structures indicate their  $m/z$ .



**Table S2** Comparison for intensity of ESI-MS spectra of dissolved even numbered-ring species in the starting gels.<sup>a</sup>

| Starting gels        | Normalized intensity in ESI-MS spectra ( $\times 10^4$ )                          |                                                                                   |                                                                                    |                                                                                     |                                                                                     |
|----------------------|-----------------------------------------------------------------------------------|-----------------------------------------------------------------------------------|------------------------------------------------------------------------------------|-------------------------------------------------------------------------------------|-------------------------------------------------------------------------------------|
|                      |  |  |  |  |  |
| With seed crystal    | 6.5                                                                               | 7.7                                                                               | 4.5                                                                                | 1.5                                                                                 | 1.1                                                                                 |
| Without seed crystal | 3.3                                                                               | 5.4                                                                               | 2.3                                                                                | 0.3                                                                                 | 0.5                                                                                 |

<sup>a</sup>These values correspond to Fig. S2.

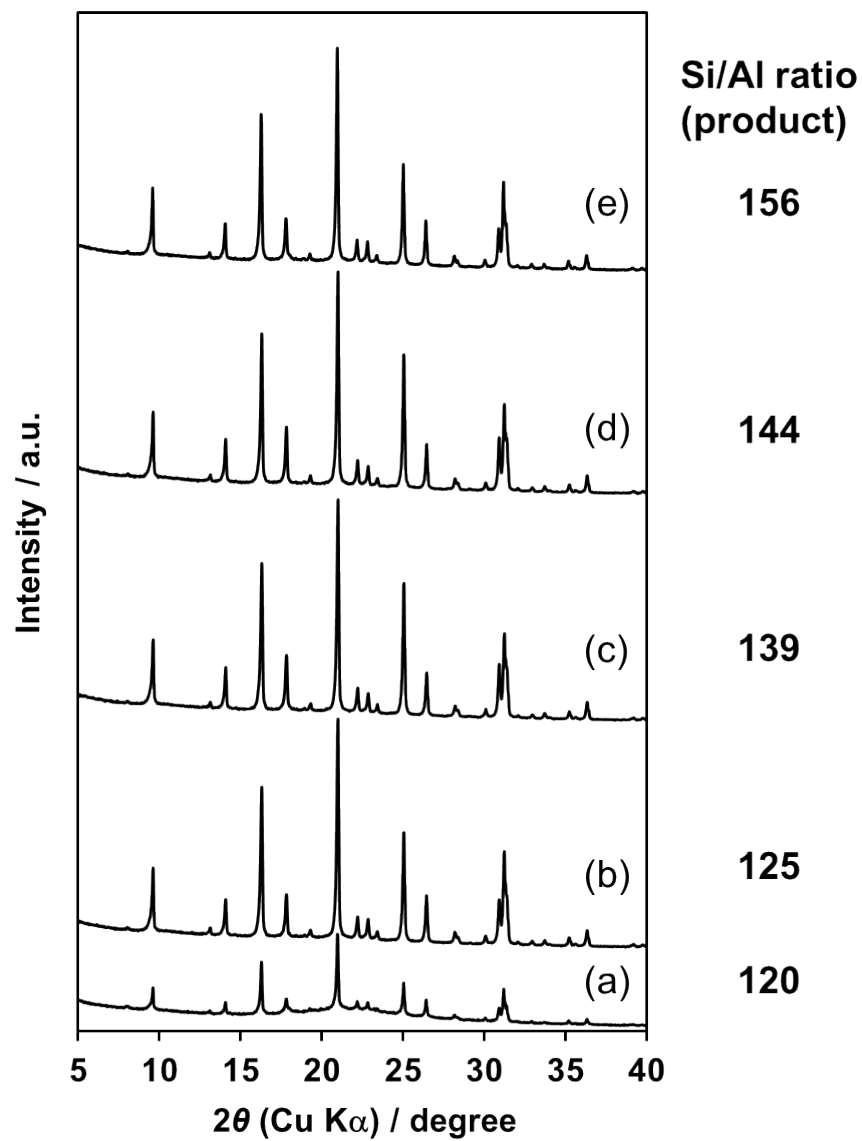

**Fig. S3** XRD patterns for synthesized CHA-type zeolites (as-prepared) with different aging times: (a) 0, (b) 3, (c) 6, (d) 12 and (e) 24 h (CHA(300)). The Si/Al ratios were estimated by ICP-AES.

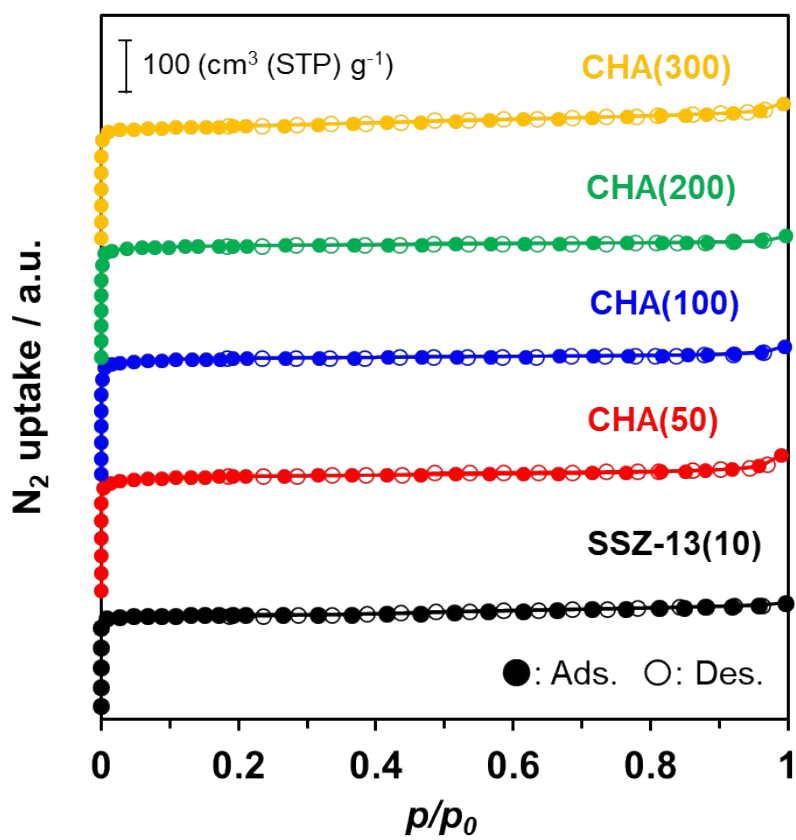

Fig. S4 N<sub>2</sub> adsorption–desorption isotherms for synthesized CHA-type aluminosilicates.

**(A)  $^{27}\text{Al}$  MAS NMR spectra**

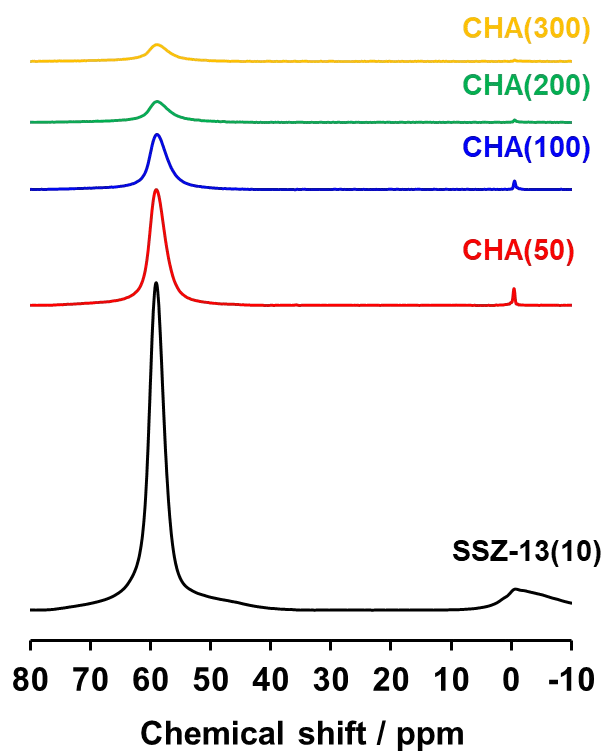

**(B)  $\text{NH}_3$ -TPD profiles**

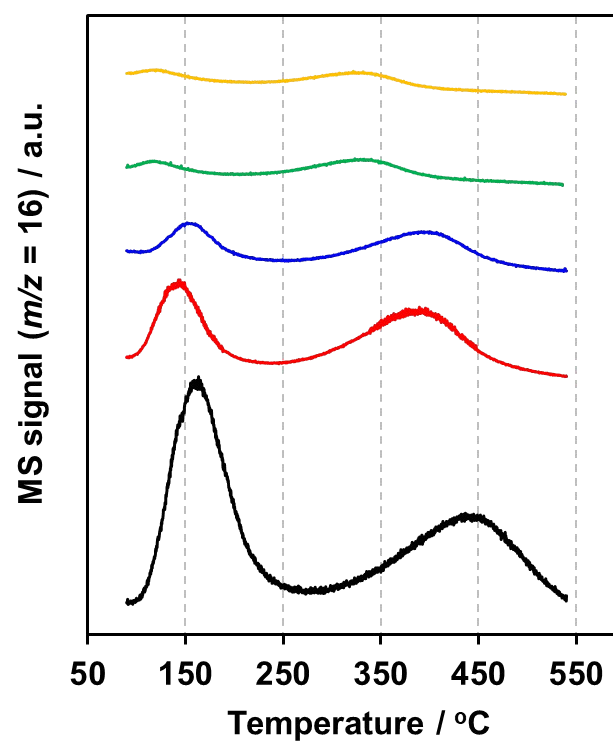

**Fig. S5** (A)  $^{27}\text{Al}$  MAS NMR spectra and (B)  $\text{NH}_3$ -TPD profiles for each sample.

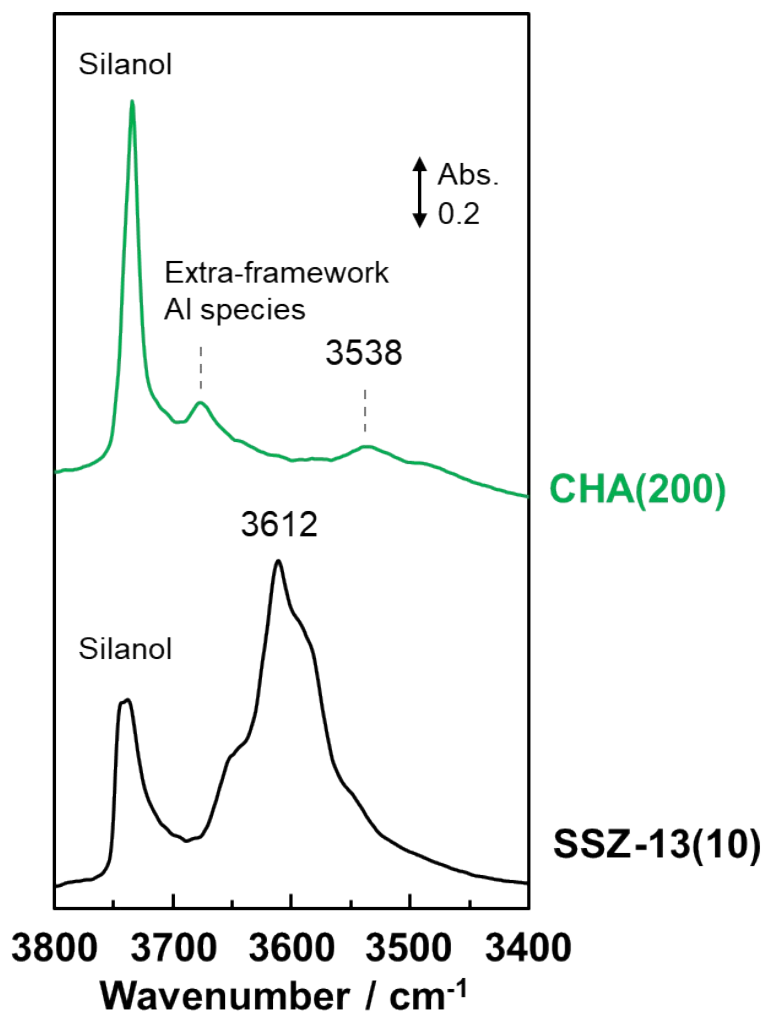

**Fig. S6** FT-IR spectra of SSZ-13(10) and CHA(200) at 25 °C.

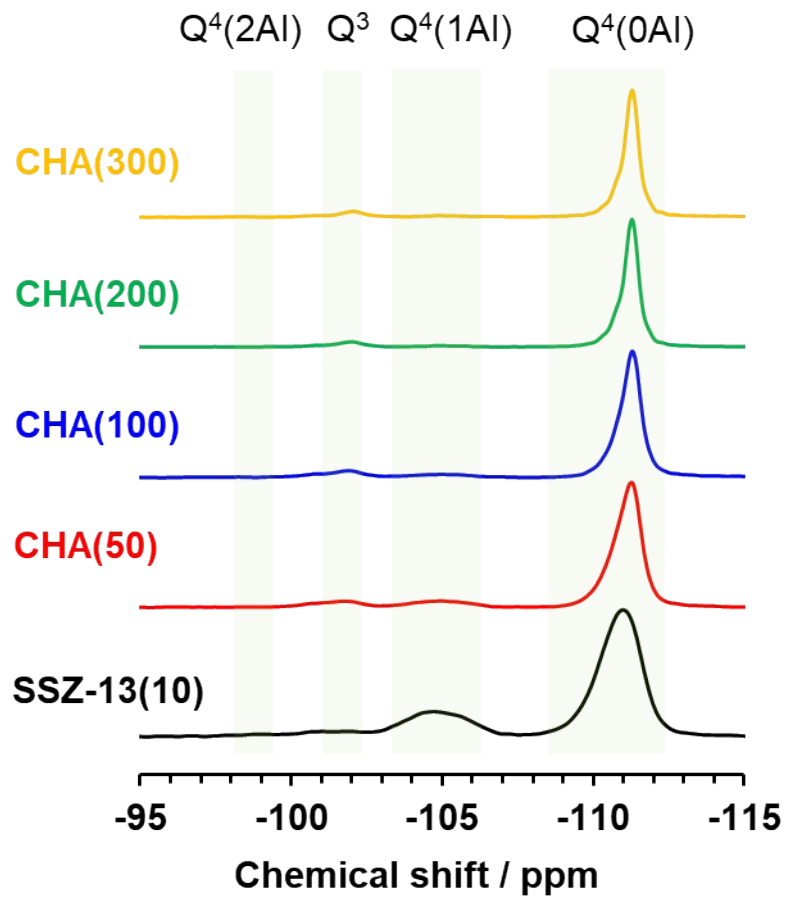

Fig. S7  $^{29}\text{Si}$  MAS NMR spectra of each sample.

**Table S3** Quantitative analysis for  $^{29}\text{Si}$  MAS NMR measurements.<sup>a</sup>

| Sample     | Integrated intensity |                      |                      |                | Q <sup>3</sup> /Q <sup>4</sup> |
|------------|----------------------|----------------------|----------------------|----------------|--------------------------------|
|            | Q <sup>4</sup> (0Al) | Q <sup>4</sup> (1Al) | Q <sup>4</sup> (2Al) | Q <sup>3</sup> |                                |
| SSZ-13(10) | 6.50                 | 1.95                 | 0.41                 | 0.26           | 0.05                           |
| CHA(50)    | 7.82                 | 0.80                 | 0                    | 0.67           | 0.08                           |
| CHA(100)   | 8.26                 | 0.42                 | 0                    | 0.72           | 0.08                           |
| CHA(200)   | 7.55                 | 0.13                 | 0                    | 0.52           | 0.07                           |
| CHA(300)   | 7.11                 | 0.08                 | 0                    | 0.46           | 0.06                           |

<sup>a</sup>Examined via deconvolution of  $^{29}\text{Si}$  MAS NMR spectrum shown in Fig. S7.

**Table S4** Catalytic performance of **CHA**-type aluminosilicates in MTO reaction at initial stage.

| Samples    | Conversion<br>(C-atom%) | Product selectivity (C-atom%) |                 |                 |                      |           |
|------------|-------------------------|-------------------------------|-----------------|-----------------|----------------------|-----------|
|            |                         | C <sub>2=</sub>               | C <sub>3=</sub> | C <sub>4=</sub> | Over C <sub>5s</sub> | Paraffins |
| SSZ-13(10) | >99                     | 14                            | 23              | 14              | 6                    | 43        |
| CHA(50)    | >99                     | 34                            | 36              | 14              | 7                    | 9         |
| CHA(100)   | >99                     | 37                            | 38              | 14              | 7                    | 4         |
| CHA(200)   | >99                     | 41                            | 38              | 14              | 5                    | 2         |
| CHA(300)   | >99                     | 40                            | 37              | 13              | 8                    | 2         |

Reaction conditions: 100 mg catalyst, 5 vol% methanol in Ar gas,  $W/F_{\text{MeOH}} = 68 \text{ g h mol}^{-1}$ , TOS = 10 min.



### Supplementary references

- [S1] R. Osuga, T. Yokoi and J. N. Kondo, *J. Catal.*, 2019, **371**, 291–297.
- [S2] S. I. Zones, *US Pat.*, 1985, 4,544,538
- [S3] M. J. Díaz-Cabañas, P. A. Barrett and M. A. Camblor, *Chem. Commun.*, 1998, 1881–1882.
- [S4] Q. Zhu, J. N. Kondo, R. Ohnuma, Y. Kubota, M. Yamaguchi and T. Tatsumi, *Microporous Mesoporous Mater.*, 2008, **112**, 153–161.
- [S5] L. Wu and E. J. M. Hensen, *Catal. Today*, 2014, **235**, 160–168.
- [S6] Y. Kubota, S. Inagaki and T. Fukuoka, JP Pat., P2016-169118A, 2016.
- [S7] M. Zhu, L. Liang, H. Wang, Y. Liu, T. Wu, F. Zhang, Y. Li, I. Kumakiri, X. Chen and H. Kita, *Ind. Eng. Chem. Res.*, 2019, **58**, 14037–14043.
- [S8] Y. Li, R. Liu, Q. Guo, H. Bian, A. Lan, X. Li, P. Han and T. Dou, *J. Porous Mater.*, 2019, **26**, 1879–1888.
- [S9] H. Al Jabri, K. Miyake, K. Ono, M. Nakai, Y. Hirota, Y. Uchida, M. Miyamoto and N. Nishiyama, *Microporous Mesoporous Mater.*, 2019, **278**, 322–326.
- [S10] C. Baerlocher and L. B. McCusker, Database of Zeolite Structures, <http://www.iza-structure.org/databases/>, (accessed July 2022).
